# Supplementary material for: gga-microRNA-375 negatively regulates the cell cycle and proliferation by targeting Yes-associated protein 1 in DF-1 cells
Source: PubMed Central journal article supplement — Exp Ther Med. 2020 May 4;20(1):530–42. doi: 10.3892/etm.2020.8711 (PMC7281959; doi:10.3892/etm.2020.8711), 2020-05-04

Figure S1. Identification of YAP1 as a target gene of gga-miR-375 and the expression levels of gga-miR-375 and YAP1 in DF-1 cells after ALV-J infection. (A) Seed region complementary to gga-miR-375 and YAP1. (B) gga-miR-375 is important for the relative luciferase activity of YAP1. (C) gga-miR-375 was successfully overexpressed after transfection with gga-miR-375 mimic in DF-1 cells. (D) Reverse transcription-quantitative PCR results identified that gga-miR-375 overexpression could downregulate the mRNA expression of YAP1 48 h after transfection. (E) Overexpression of gga-miR-375 could downregulate the protein expression of YAP1 48 h after transfection using western blot analysis. (F) ALV-J infection decreased gga-miR-375 expression 48 h after transfection in DF-1 cells. ALV-J infection increases YAP1 (G) mRNA and (H) protein expression levels 48 h after transfection in DF-1 cells. Data are presented as the mean  $\pm$  SD of three independent experiments. \*\* $P < 0.01$ . ALV-j, avian leukosis virus subgroup J; YAP1, Yes-associated protein 1; miR, microRNA; wt, wild-type; mut, mutant; NC, negative control; 3'UTR, 3'untranslated region.

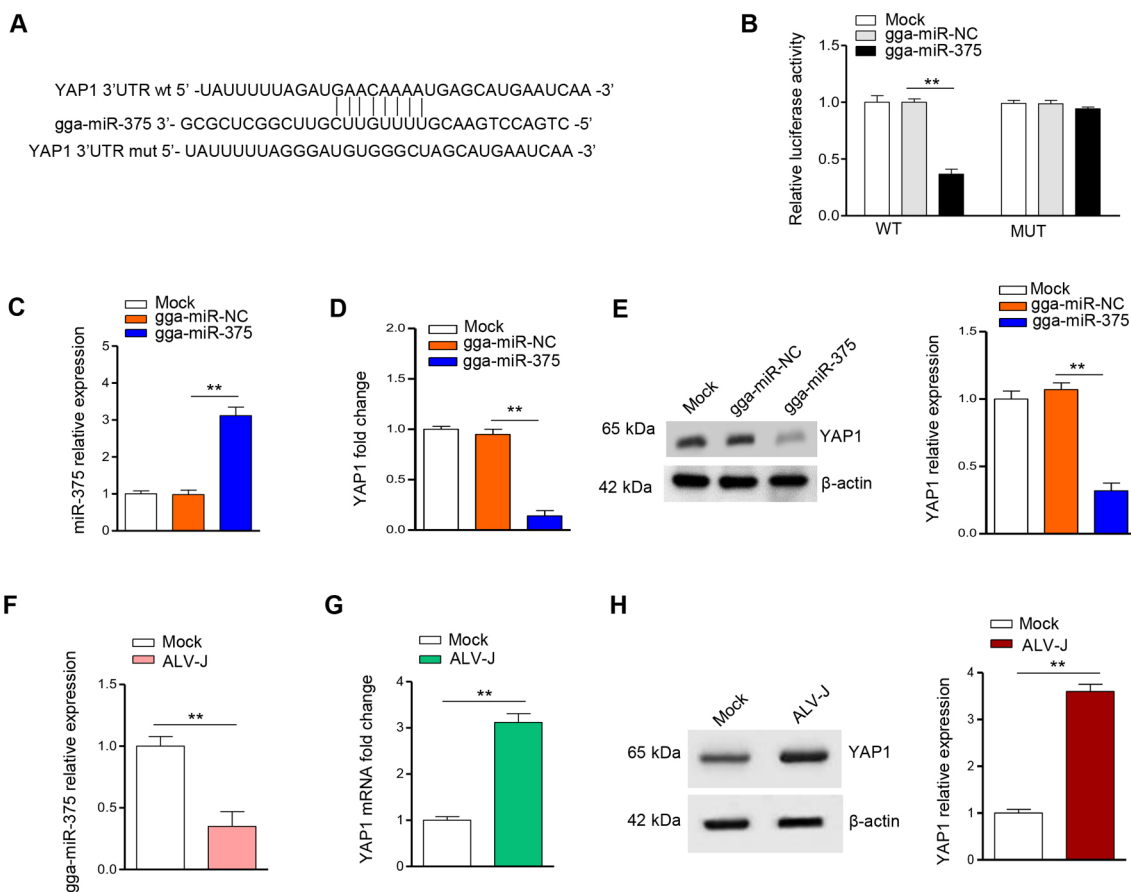

Figure S2. gga-miR-375 affects the protein expression of p53 in DF-1 cells. (A) Overexpression of gga-miR-375 upregulated the protein expression of p53. Cells were transfected with gga-miR-375 mimic, gga-miR-NC or mock for 48 h and western blot analysis with antibodies against p53 and  $\beta$ -actin was performed. gga-miR-NC and mock groups were used as the control groups. (B) Knockdown of gga-miR-375 downregulated the protein expression of p53. DF-1 cells were transfected with gga-miR-375 inhibitor and harvested 48 h after transfection for western blot analysis. Anti-gga-miR-con group and mock group were the control groups. Data are presented as the mean  $\pm$  SD of three independent experiments. \*\* $P < 0.01$ . miR, microRNA; NC, negative control; con, control.

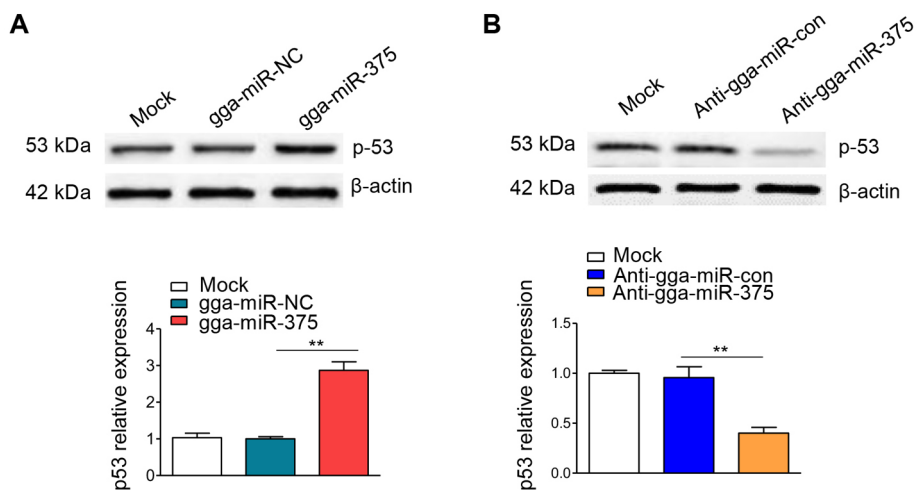

Figure S3. Effect of ALV-J infection, gga-miR-375 overexpression or silencing gga-miR-375 on YAP1 and p-YAP1. (A) ALV-J infection increased the expression of YAP1, but decreased p-YAP1 at 48 h after infection in DF-1 cells. (B) Cells were transfected with gga-miR-375 inhibitor and harvested 48 h after transfection for western blot analysis with antibodies against YAP1, p-YAP1 and  $\beta$ -actin. Anti-gga-miR-con and mock groups were used as the control groups. (C) Cells were transfected with gga-miR-375 and harvested 48 h after transfection for western blot analysis with antibodies against YAP1, p-YAP1 and  $\beta$ -actin. gga-miR-con group and mock group were the control groups. Data are presented as the mean  $\pm$  SD of three independent experiments. \*\* $P < 0.01$ . p, phosphorylated; miR, microRNA; con, control; YAP1, Yes-associated protein 1.

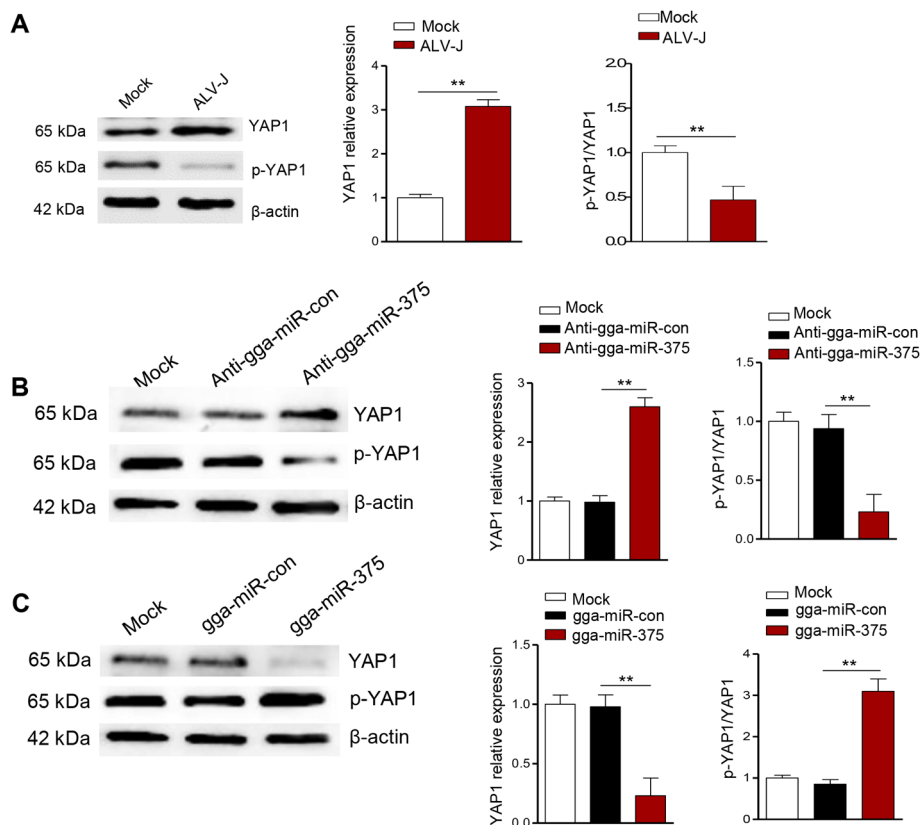

Figure S4. Effect of gga-miR-375 on the expression levels of MST1, SAV1, MOB1 and LATS1. Cells were transfected with gga-miR-375 and harvested 48 h after transfection for western blot analysis with antibodies against MST1, SAV1, MOB1, LATS1 and GAPDH. gga-miR-NC group was the control group. Data are presented as the mean  $\pm$  SD of three independent experiments. n.s., not significant; NC, negative control; miR, microRNA; MST1, Macrophage stimulating 1; MOB1, MOB kinase activator 1; LATS1, large tumor suppressor kinase 1; SAV1, salvador family WW domain containing protein 1.

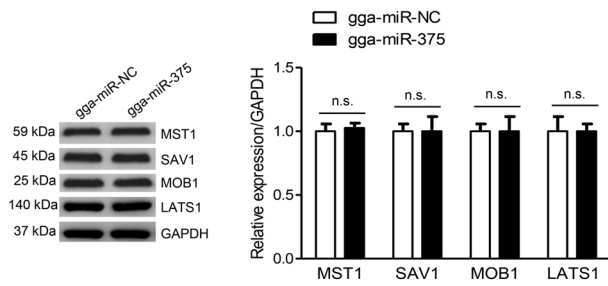

Supplement: Supplementary_Data.pdf [file Supplementary_Data.pdf]
